# Supplementary material
Source: PubMed Central journal article supplement (PMC8454823)

Reported deaths (daily cases per million people)

Reported incidence (daily cases per million people)

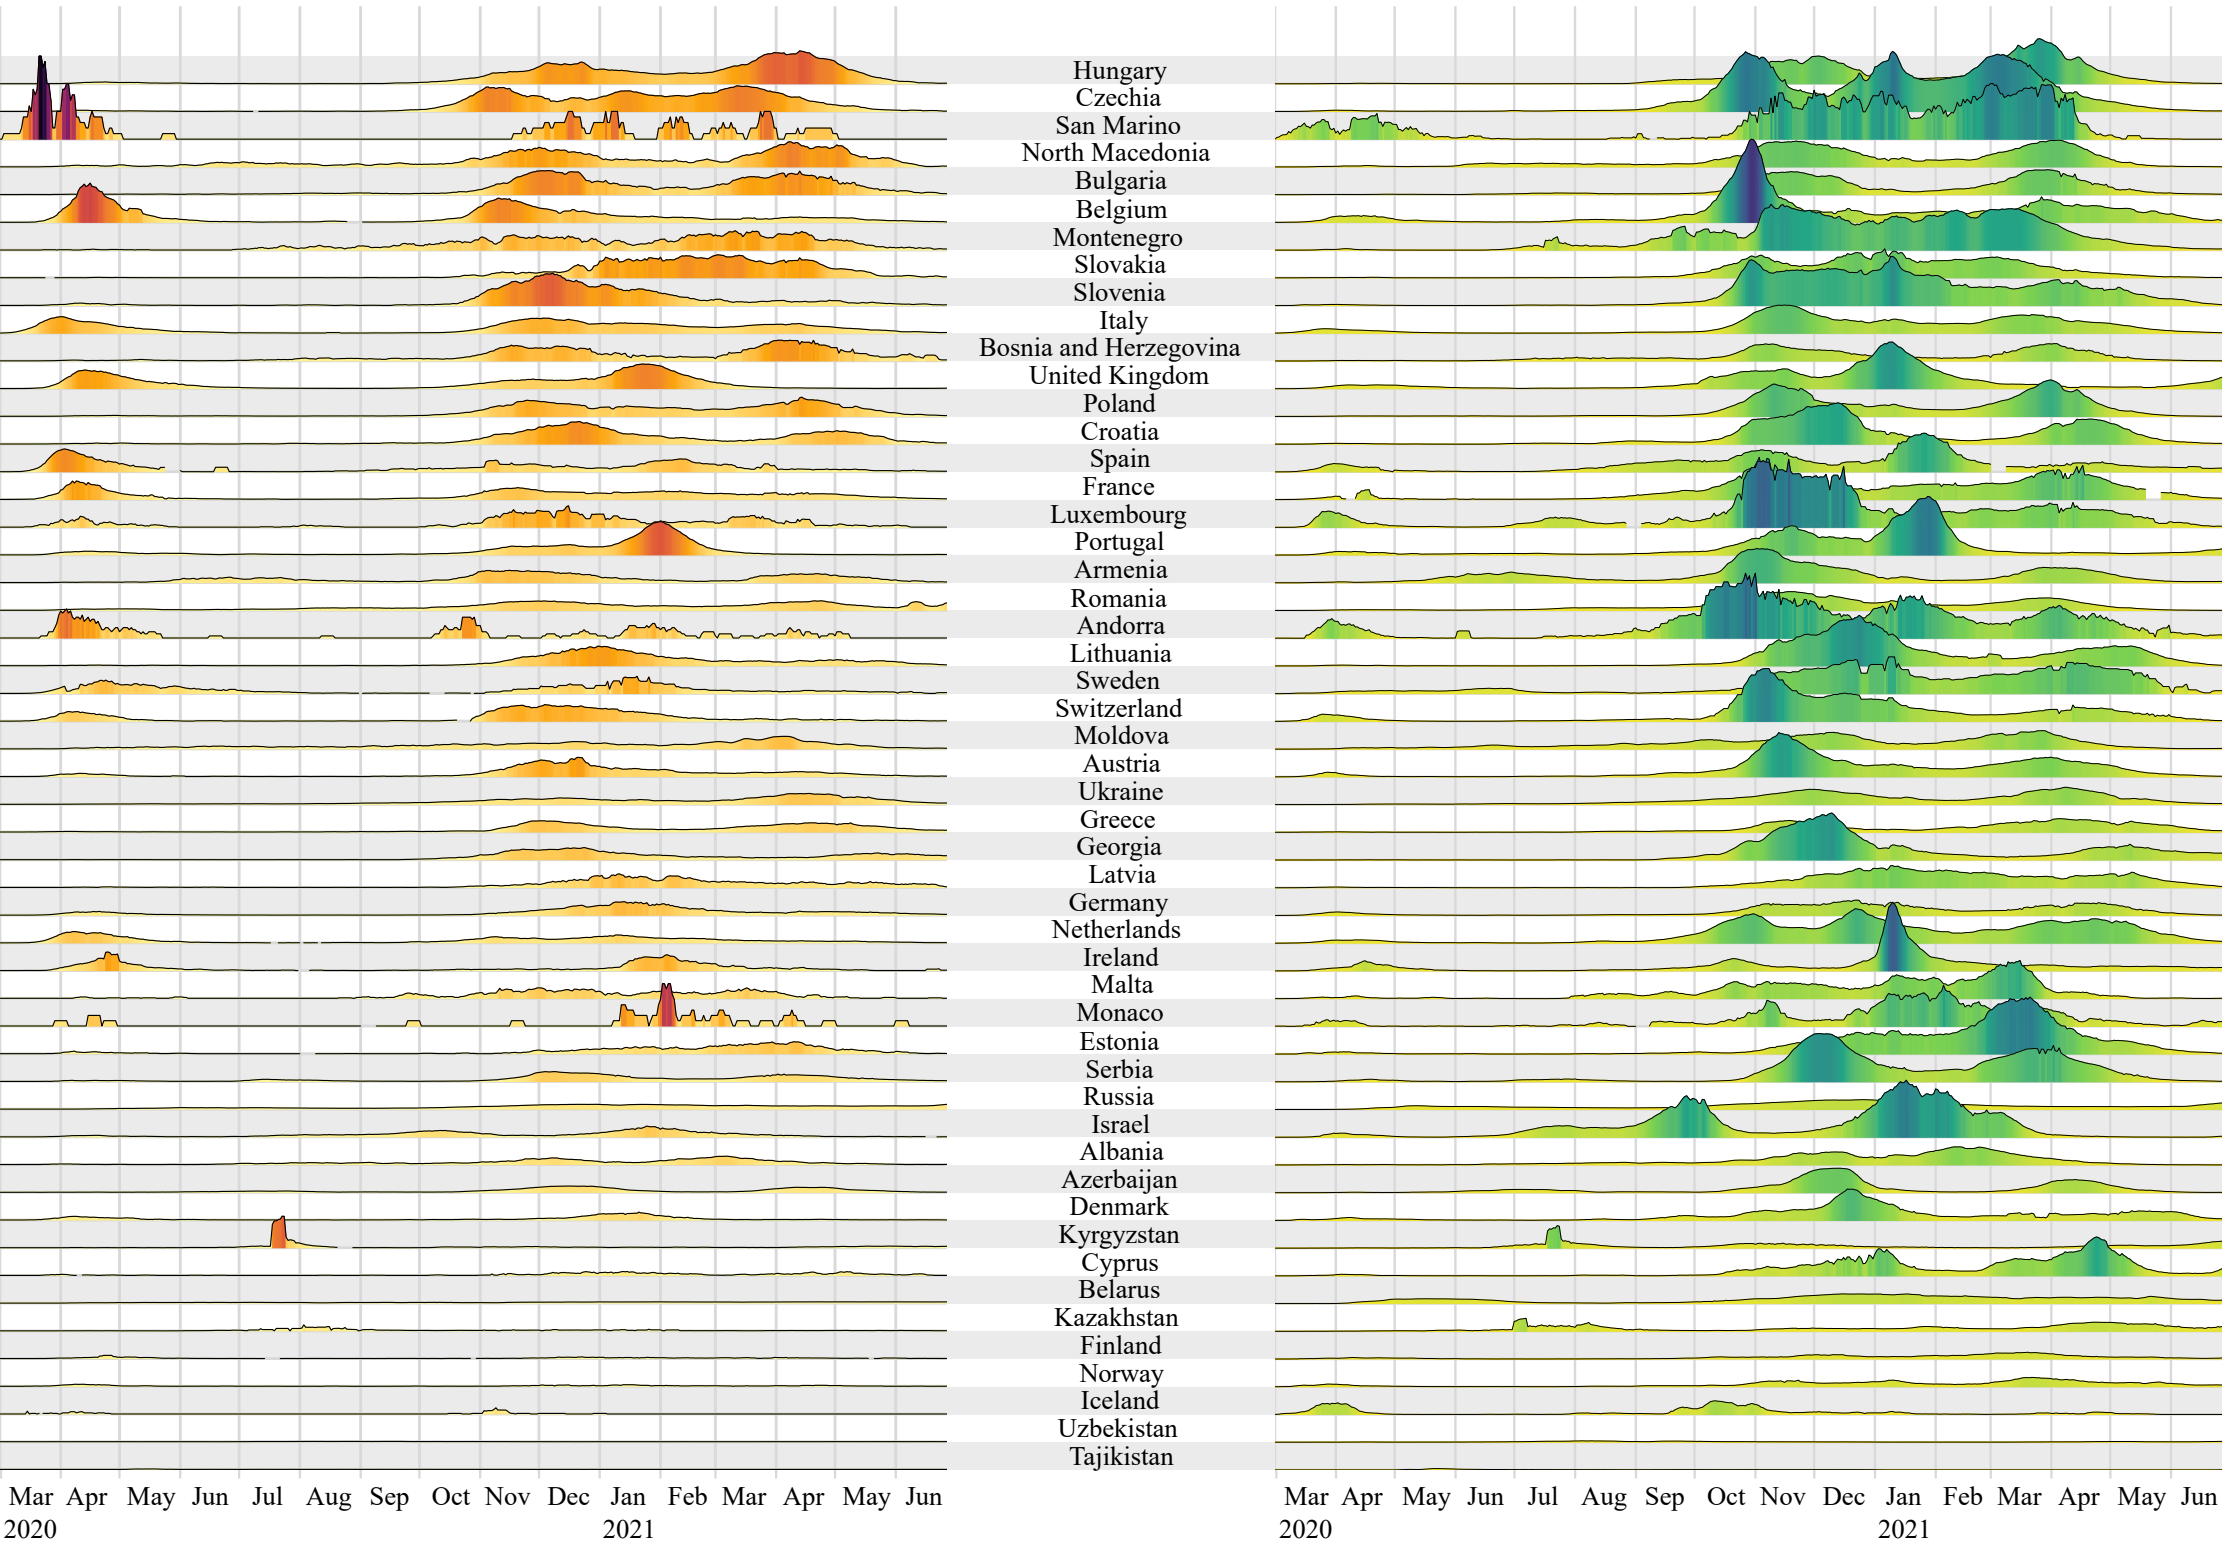

- Hungary
- Czechia
- San Marino
- North Macedonia
- Bulgaria
- Belgium
- Montenegro
- Slovakia
- Slovenia
- Italy
- Bosnia and Herzegovina
- United Kingdom
- Poland
- Croatia
- Spain
- France
- Luxembourg
- Portugal
- Armenia
- Romania
- Andorra
- Lithuania
- Sweden
- Switzerland
- Moldova
- Austria
- Ukraine
- Greece
- Georgia
- Latvia
- Germany
- Netherlands
- Ireland
- Malta
- Monaco
- Estonia
- Serbia
- Russia
- Israel
- Albania
- Azerbaijan
- Denmark
- Kyrgyzstan
- Cyprus
- Belarus
- Kazakhstan
- Finland
- Norway
- Iceland
- Uzbekistan
- Tajikistan

Mar Apr May Jun Jul Aug Sep Oct Nov Dec Jan Feb Mar Apr May Jun  
2020 2021

Mar Apr May Jun Jul Aug Sep Oct Nov Dec Jan Feb Mar Apr May Jun  
2020 2021

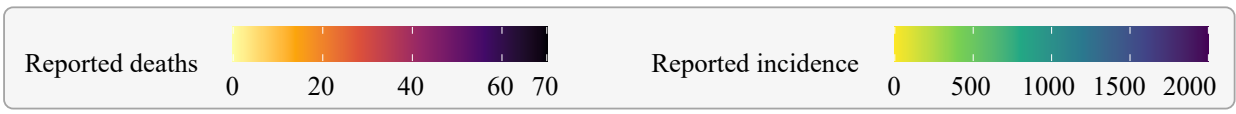

Supplement: mmc4.pdf [file mmc4.pdf]
