# Supplementary material
Source: PubMed Central journal article supplement (PMC8454823)

**a**

**Percent of population vaccinated with at least one dose as of June 26, 2021**

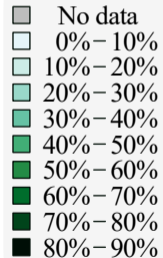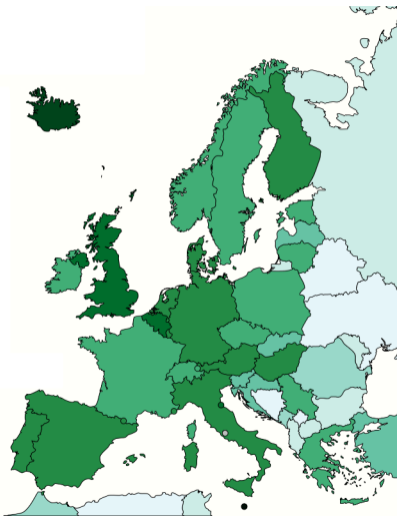**b**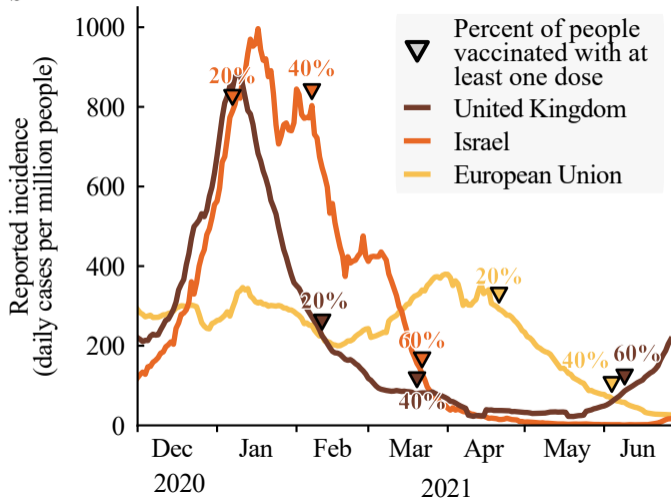

Supplement: mmc6.pdf [file mmc6.pdf]
